# Supplementary material for: A Novel β-adaptin/c-Myc Complex Formation Modulated by Oxidative Stress in the Control of the Cell Cycle in Macrophages and its Implication in Atherogenesis
Source: PubMed Central journal article supplement (PMC5647411; doi:10.1038/s41598-017-13880-5), 2017-10-18

# A Novel $\beta$ -adapin/c-Myc Complex Formation Modulated by Oxidative Stress in the Control of the Cell Cycle in Macrophages and its Implication in Atherogenesis

Victor García-González & Jaime Mas-Oliva

## Supplementary material

**Supplementary fig. 1** | Treatment with increasing concentrations of oxLDL generates an oxidative state in macrophages. **(a)** Fluorescence values associated with the internalization of oxLDL labeled with DiI after 16 h. **(b)** Evaluation of ROS production under the same experimental conditions. **(c)** Cell viability through MTT assay. Confocal microscopy images of macrophages stimulated with 0 **(d)**, 0.1 **(e)**, 10 **(f)** and 100  $\mu\text{g/ml}$  **(g)** oxLDL. Nucleus stained with Hoechst. Mean values are presented ( $n=5$ ,  $X \pm \text{SD}$ ) \* $p<0.05$ , \*\* $p<0.01$ .

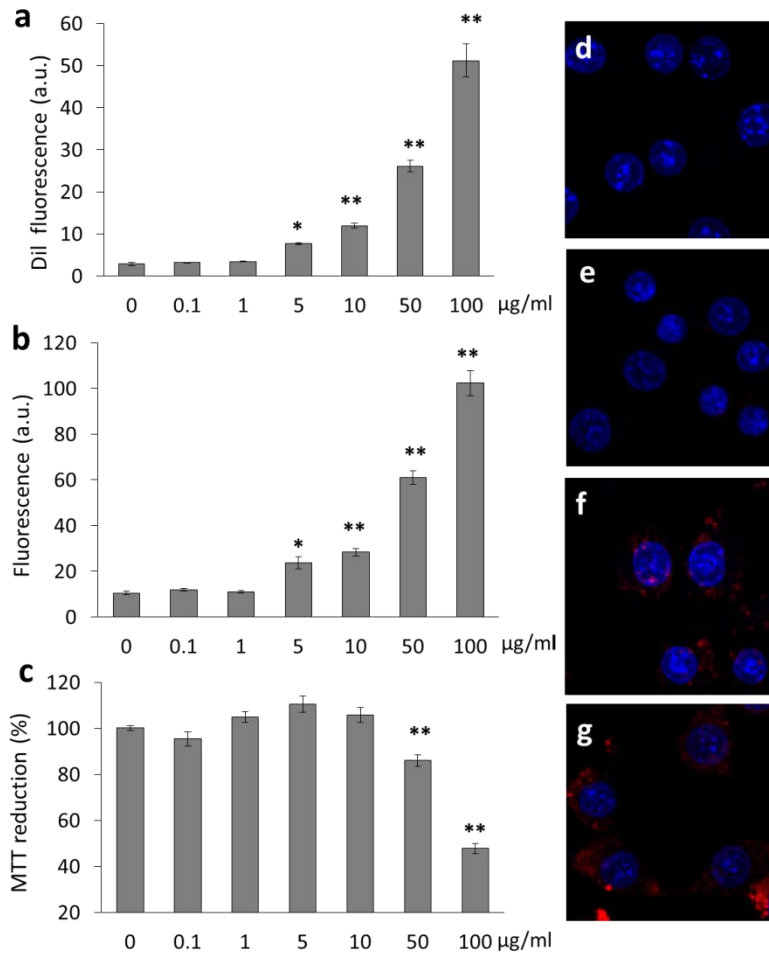

**Supplementary fig. 2** | Effect of pretreatment with  $\alpha$ -tocopherol in macrophages later stimulated with LMB, natLDL and oxLDL for 4 h. **(a)** Evaluation of particle internalization. **(b)** Characterization of ROS production. Mean values are presented (n=5, X  $\pm$  SD) \*p<0.05, \*\*p<0.01.

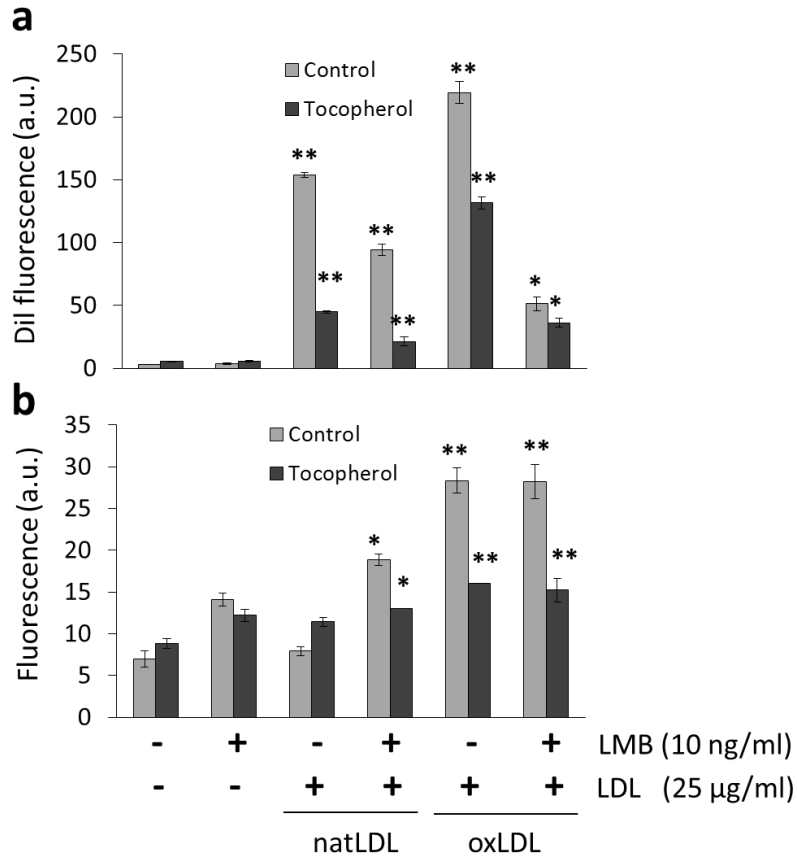

**Supplementary fig. 3** | Effect of LPS treatment (100 ng/ml) in hepatocyte cultures stimulated with natLDL and oxLDL. **(a)** Evaluation of internalization. **(b)** Characterization of ROS production. . Mean values are presented (n=5, X ± S.E.M.), \*p<0.05, \*\*p<0.01.

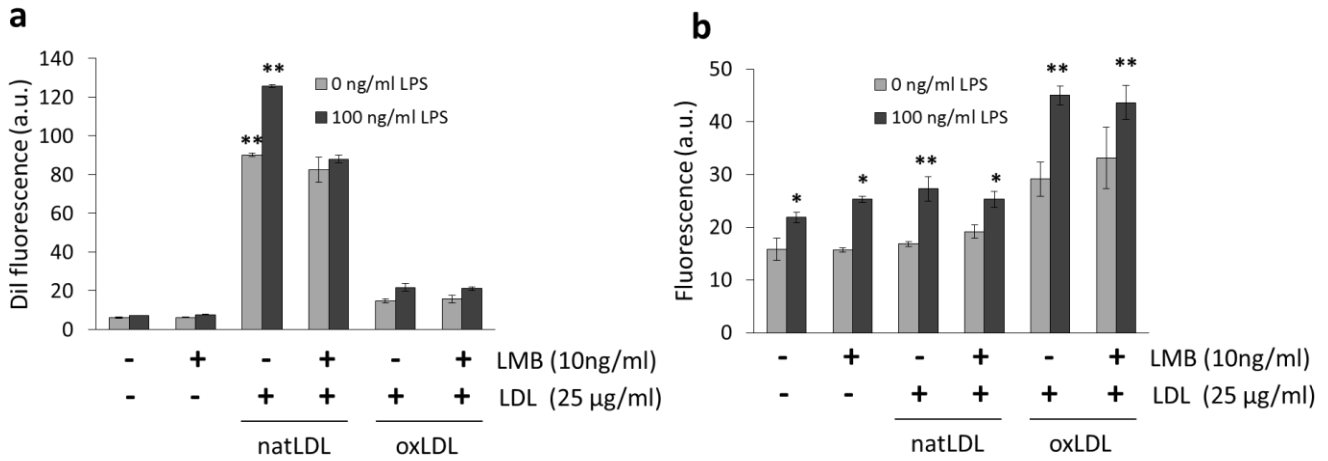

**Supplementary fig. 4** | SR-B1 expression under treatment with oxLDL (10  $\mu\text{g/ml}$ ) in hepatocytes (**a**) and in macrophages (**b**).

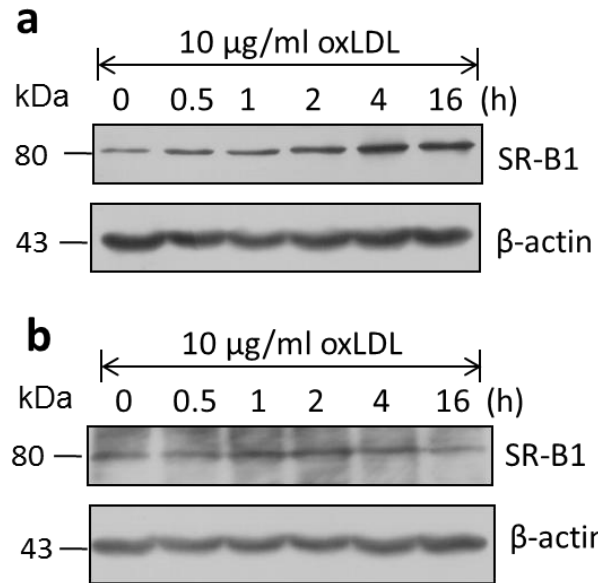

Supplement: 41598_2017_13880_MOESM1_ESM.pdf [file 41598_2017_13880_MOESM1_ESM.pdf]
